# Supplementary material for: p-CdTe nanoribbon/n-silicon nanowires array heterojunctions: photovoltaic devices and zero-power photodetectors
Source: Royal Society of Chemistry journal article supplement (doi:10.1039/c2ce25791b), 2012-01-01
Supplement: c2ce25791b.pdf [file c2ce25791b.pdf]

## Supporting information

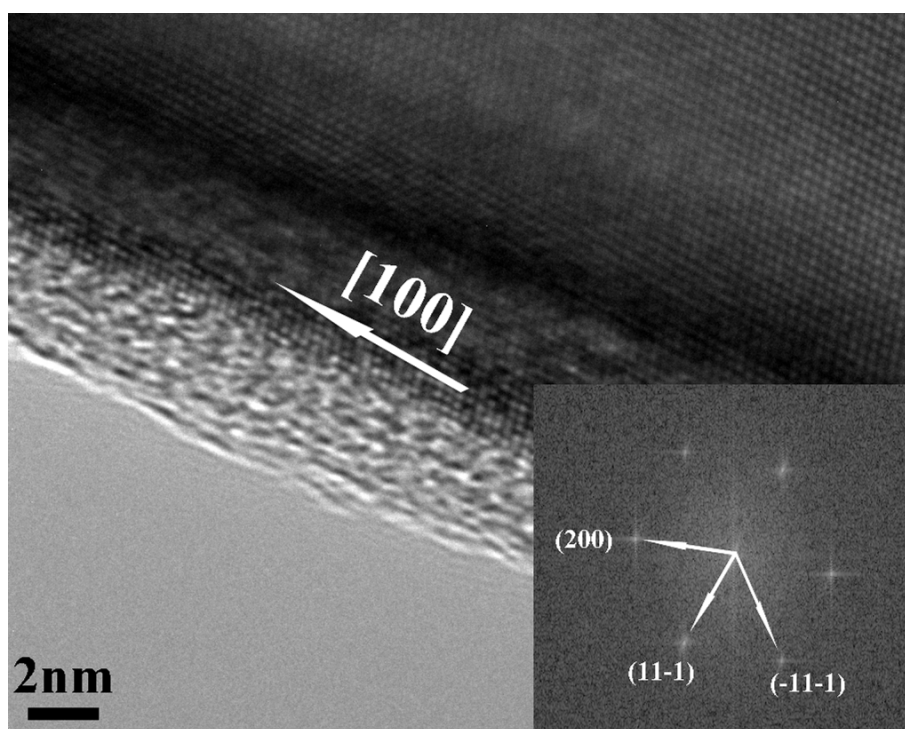

Fig S1. HRTEM image of an individual SiNW prepared by Ag-assisted chemical etching method. Inset shows the corresponding FFT pattern.

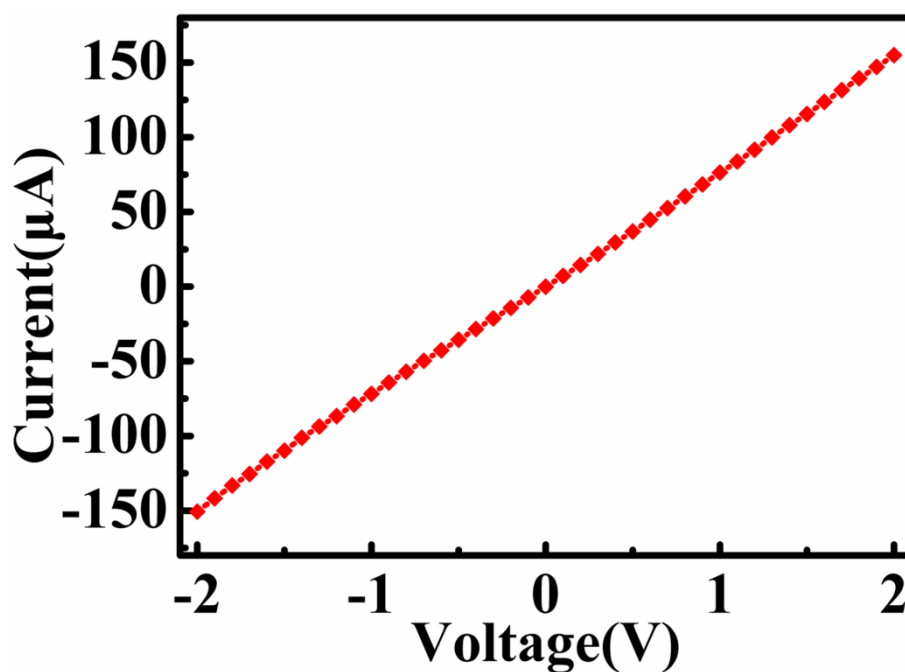

Fig S2. Typical *I-V* curve of *p*-CdTe :Sb NR.
